# Supplementary material for: Influence of Ni and Sn Perovskite NiSn(OH)6 Nanoparticles on Energy Storage Applications
Source: MDPI journal article supplement (doi:10.3390/nano13091523), 2023-04-30
Supplement: s1 [file s1]

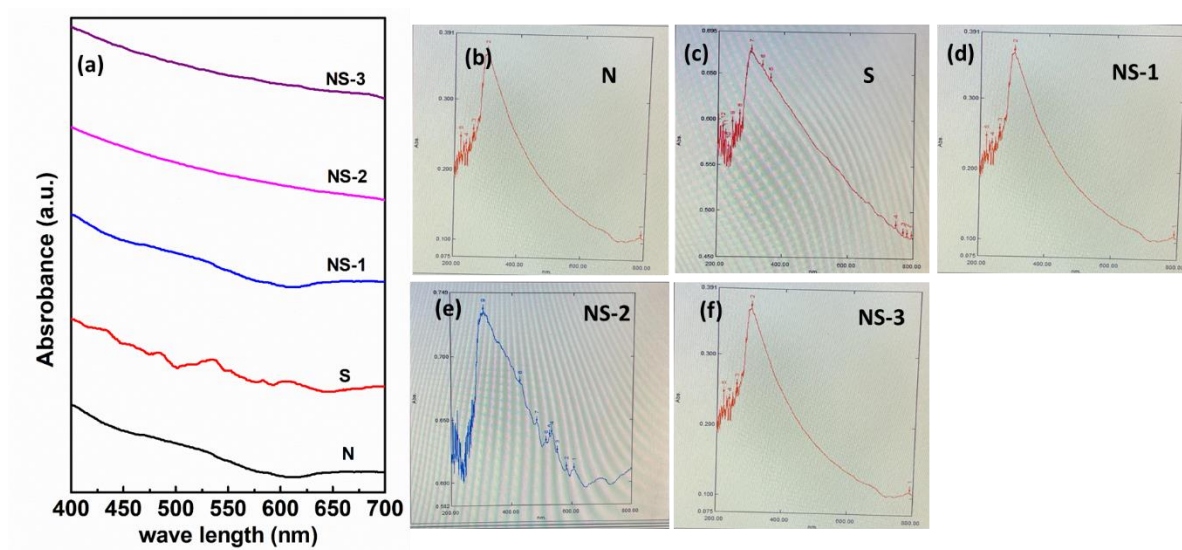

Figure S1. UV spectra of prepared samples.

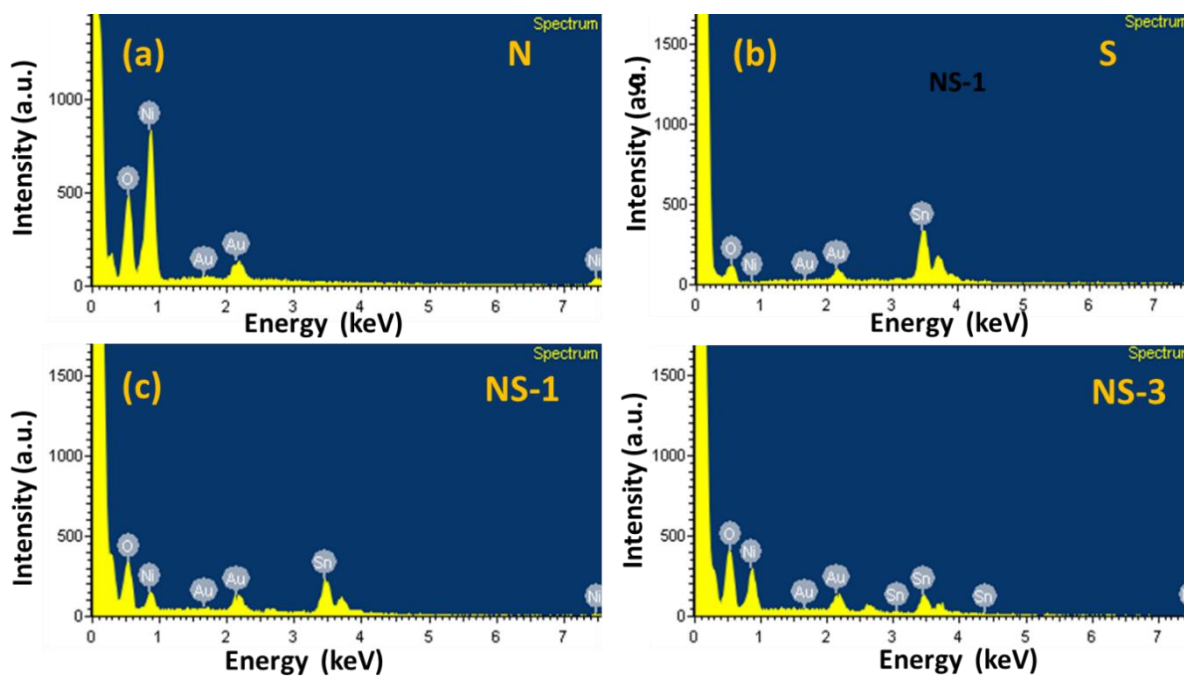

Figure S2. The EDAX spectra of (a) N, (b) S, (c) NS-1 and (d) NS-3 samples.

**Table S1.** Specific capacitance of NiSn(OH)<sub>6</sub> hydroxide nanomaterials.

| Current Density(A/g) | Specific Capacitance (F/g) |     |      |      |      |
|----------------------|----------------------------|-----|------|------|------|
|                      | N                          | S   | NS-1 | NS-2 | NS-3 |
| 1                    | 380                        | 323 | 509  | 607  | 565  |
| 2                    | 276                        | 219 | 328  | 450  | 350  |
| 3                    | 225                        | 181 | 272  | 410  | 290  |
| 4                    | 190                        | 123 | 210  | 388  | 225  |
| 5                    | 160                        | 105 | 170  | 338  | 188  |
